# Supplementary material
Source: HighWire-hosted journal article supplement (https://bmjopen.bmj.com/content/15/2/e087413)
Supplement: inline-supplementary-material-1 [file inline-supplementary-material-1.pdf]

Additional file

Table S1: Types of interaction between two factors

| Interactive effects                     | Condition                                                       |
|-----------------------------------------|-----------------------------------------------------------------|
| Two-factor enhancement                  | $Q(X_I \cap X_2) > \max(Q(X_I), Q(X_2))$                        |
| Nonlinear enhancement                   | $Q(X_I \cap X_2) > Q(X_I) + Q(X_2)$                             |
| Single-factor nonlinearities,<br>weaken | $\min(Q(X_I), Q(X_2)) < Q(X_I \cap X_2) < \max(Q(X_I), Q(X_2))$ |
| Nonlinear weakening                     | $Q(X_I \cap X_2) < \min(Q(X_I), Q(X_2))$                        |
| Independent                             | $Q(X_I \cap X_2) = Q(X_I) + Q(X_2)$                             |

The symbol of “ $\cap$ ” means the interaction of two factors, and  $Q(X_I \cap X_2)$  represents the  $Q$ -value for the interaction between two factors  $X_I$  and  $X_2$ .

Table S2: Overview of socio-economic, public health and environmental factors in Xinjiang, China,

| 2011-2019             |                                          |            |               |               |               |
|-----------------------|------------------------------------------|------------|---------------|---------------|---------------|
| Variable              |                                          | Mean       | 25%percentile | 50%percentile | 75%percentile |
| Environmental factors | PM2.5 （μg/m <sup>3</sup> ）               | 43.51      | 28.23         | 38.73         | 54.65         |
|                       | Temperature （℃）                          | 8.82       | 7.53          | 8.51          | 9.97          |
|                       | Wind speed （m/s）                         | 2.20       | 1.83          | 2.19          | 2.45          |
|                       | Relative humidity(RH%)                   | 51.49      | 45.13         | 52.71         | 57.33         |
|                       | Precipitation(mm)                        | 256.37     | 215.32        | 250.23        | 291.47        |
| Socioeconomic factors | Per capita GDP(/10,000RMB)               | 5.05       | 2.69          | 4.25          | 6.87          |
|                       | Population density(persons/sq.km)        | 25.69      | 8.23          | 14.06         | 19.90         |
|                       | Revenue(/10,000RMB)                      | 757806.12  | 261410.00     | 489168.50     | 833921.75     |
|                       | TRSCG(/10,000RMB)                        | 1634245.05 | 457587.50     | 787891.50     | 1699853.00    |
| Public health factor  | Number of hospital beds(/10,000 persons) | 62.56      | 53.60         | 58.18         | 65.81         |
|                       | Health personnel(person)                 | 10851.87   | 4081.75       | 6915.50       | 11753.25      |
|                       | URBMI(/10,000 persons)                   | 50.06      | 10.06         | 25.48         | 50.72         |
